# Supplementary material for: Diastereoselectivity controlled by electrostatic repulsion between the negative charge on a trifluoromethyl group and that on aromatic ringsElectronic supplementary information (ESI) available: general experimental methods and typical reaction procedure. See http://www.rsc.org/suppdata/cc/b1/b105602f/
Source: Royal Society of Chemistry journal article supplement (doi:10.1039/b105602f), 2001-09-27
Supplement: b105602f.doc [file b105602f.doc]

**Supplementary Information**

**Diastereoselectivity controlled by electrostatic repulsion between the negative charge on a trifluoromethyl group and that on aromatic rings**

**Toshimasa Katagiri, Sachiko Yamaji, Michiharu Handa, Minoru Irie,**

**and Kenji Uneyama***

Department of Applied Chemistry, Faculty of Engineering, Okayama University,

Tsushimanaka 3-1-1, Okayama 700-8530, Japan.

E-Mail: tkata@cc.okayama-u.ac.jp

**General Experimental Methods.**

Unless otherwise stated, all non-aqueous reactions and distillations were carried out under a dry argon or dry nitrogen atmosphere. All commercially available reagents and solvents were employed without further purification. Dry THF was distilled from benzophenone-Na ketyl solution just prior to use.

Chromatography on silica gel was performed using a forced flow of the solvent system on E. Merck silica gel (Kieselgel 60, 230-400 mesh). GC analyses were performed using Shimadzu GC-12A system connected to GL-Science CP-Cyclodex--256M Capillary column.

IR spectra were measured on a Hitachi model 270-30 infrared spectrometer. The 1H (200 MHz) and 19F (188 MHz) NMR spectra were recorded by Varian VXR-200 spectrometers. Chemical shifts are reported in  ppm from tetramethylsilane ( 0.0 ppm for 1H) and C6F6 ( 0.0 ppm for 19F NMR). For quantitative analyses of yields, 1,3-bis(trifluoromethyl)benzene was used as an internal standard for 19F NMR. Coupling constants (*J*) are reported in hertz. Elemental analyses were performed on Perkin Elmer series CHNS/O Analyzer 2400. GC/MS was performed on a Hewlett-Packard HP5971A.

Preparation of starting materials had been reported in our previous reports; see ref 6 and T. Katagiri, M. Akizuki, T. Kuriyama, S. Shinke, K. Uneyama, *Chem. Lett.,* **1997**, 549.

Geometry optimizations and MO calculations for estimation of charge on atoms were done with using PM3 method on MacSpartan Pro ver. 1.0.2.

For estimation of repulsion energies, following physical constants were used:  = 8.85  10-12 [C2J-1m-1], e = 1.60  10-19 [C], 1mol = 6.02  1023, 1 cal = 4.18 [J], q'(-CF3) = -0.11 e, and q'(-CN) = -0.22 e. The distance between -CF3 to -Ar was defined as average distance between center carbon of -CF3 andtwo ortho carbons on -Ar of local minimum structure of B in Scheme 1 with Ar = pyrrolyl, 4.6  10-10 [m]. Similarly, the distance between -CF3 to -CN was defined as distance between center carbon of -CF3 andnitrogen on -CN of local minimum structure of A in Scheme 1 with Ar = pyrrolyl, 5.0  10-10 [m].

**Typical procedure for reaction**

**2-Trifluoromethyl-1-phenylcyclopropyl cyanide** (entry 1 in Table 1)**.** A THF solution (1.0 ml) of 4-hydroxy-5,5,5-trifluoro-2-phenylpentanenitrile(0.16 g, 0.50 mmol) was added to a solution of *p*-TsCl (0.11 g, 0.60 mmol) and NaH 60% in oil (76 mg, 2.0 mmol) in THF (5.0 ml) at 0 °C. The mixture was stirred for 24 h at 0 °C, then reacting solution was quenched by saturated NH4Cl aq., and extracted by Et2O. The organic layer was washed with brine, dried over anhydrous Na2SO4, and concentrated in vacuo. The crude product was purified by silica gel column chromatography, with 81% de mixture of two diastereomer was obtained in 70% yield (see ref 6a).
